# Supplementary material
Source: MDPI journal article supplement (https://www.mdpi.com/2079-6412/11/4/480)
Supplement: s1 [file s1]

# Supplementary Materials: Effectiveness and Compatibility of Nanoparticle Based Multifunctional Coatings on Natural and Man-Made Stones

Martina Zuena <sup>1</sup>, Ludovica Ruggiero <sup>1</sup>, Giancarlo Della Ventura <sup>1</sup>, Edoardo Bemporad <sup>2</sup>, Maria Antonietta Ricci <sup>1</sup> and Armida Sodo <sup>1,\*</sup>

<sup>1</sup> Dipartimento di Scienze, Università Degli Studi Roma Tre, Via della Vasca Navale 84, 00146 Roma, Italy; martina.zuena@uniroma3.it (M.Z.); ludovica.ruggiero@uniroma3.it (L.R.); giancarlo.dellaventura@uniroma3.it (G.D.V.); Mariaantonieta.ricci@uniroma3.it (M.A.R.)

<sup>2</sup> Dipartimento di Ingegneria, Università Degli Studi Roma Tre, Via della Vasca Navale 79, 00146 Rome, Italy; edoardo.bemporad@uniroma3.it

\* Correspondence: armida.sodo@uniroma3.it

**Citation:** Zuena, M.; Ruggiero, L.; Della Ventura, G.; Bemporad, E.; Ricci, M.A.; Sodo, A. Effectiveness and Compatibility of Nanoparticle Based Multifunctional Coatings on Natural and Man-Made Stones.

*Coatings* **2021**, *11*, 480.

<https://doi.org/10.3390/coatings11040480>

Academic Editor:  
Jean-François Berret

Received: 29 March 2021

Accepted: 17 April 2021

Published: 20 April 2021

**Publisher's Note:** MDPI stays neutral with regard to jurisdictional claims in published maps and institutional affiliations.

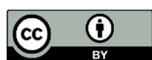

**Copyright:** © 2021 by the authors. Licensee MDPI, Basel, Switzerland. This article is an open access article distributed under the terms and conditions of the Creative Commons Attribution (CC BY) license (<http://creativecommons.org/licenses/by/4.0/>).

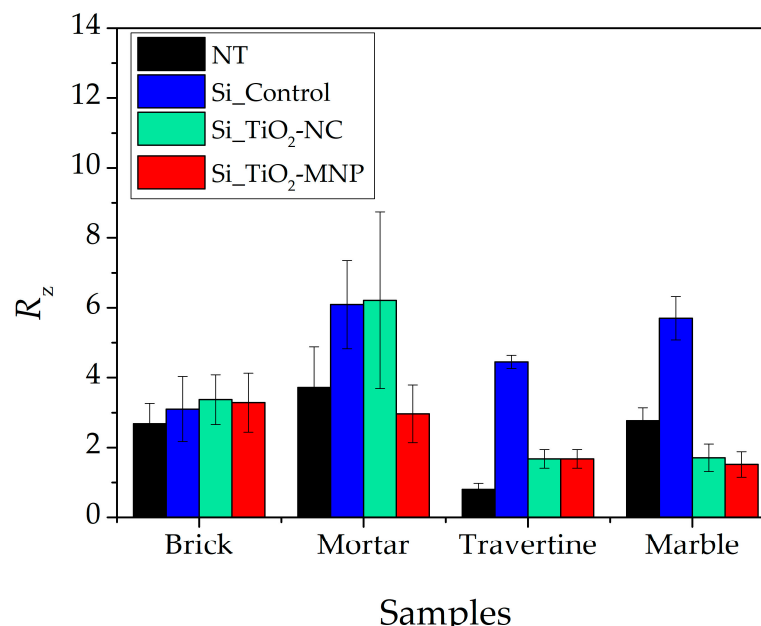

**Figure S1.** Comparison of average  $R_z$  measured before and after treatment for the different studied materials. NT: untreated; Si\_Control: coating without nanoparticles; Si\_TiO<sub>2</sub>-NC: coating with TiO<sub>2</sub> nanoparticles and loaded silica nanocapsules; Si\_TiO<sub>2</sub>-MNP: coating with TiO<sub>2</sub> nanoparticles and loaded silica mesoporous nanoparticles.

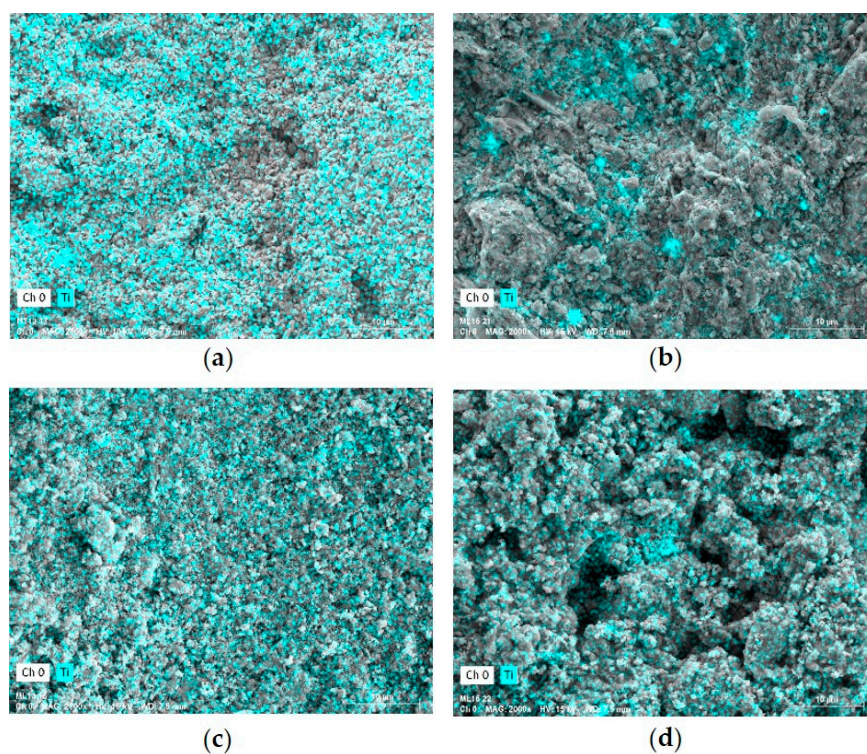

**Figure S2.** Ti distribution resulting from EDS-XFR mapping: (a) Si<sub>2</sub>TiO<sub>2</sub>-NC on brick, (b) Si<sub>2</sub>TiO<sub>2</sub>-MNP on brick, (c) Si<sub>2</sub>TiO<sub>2</sub>-NC on mortar and (d) Si-TiO<sub>2</sub>-MNP on mortar.

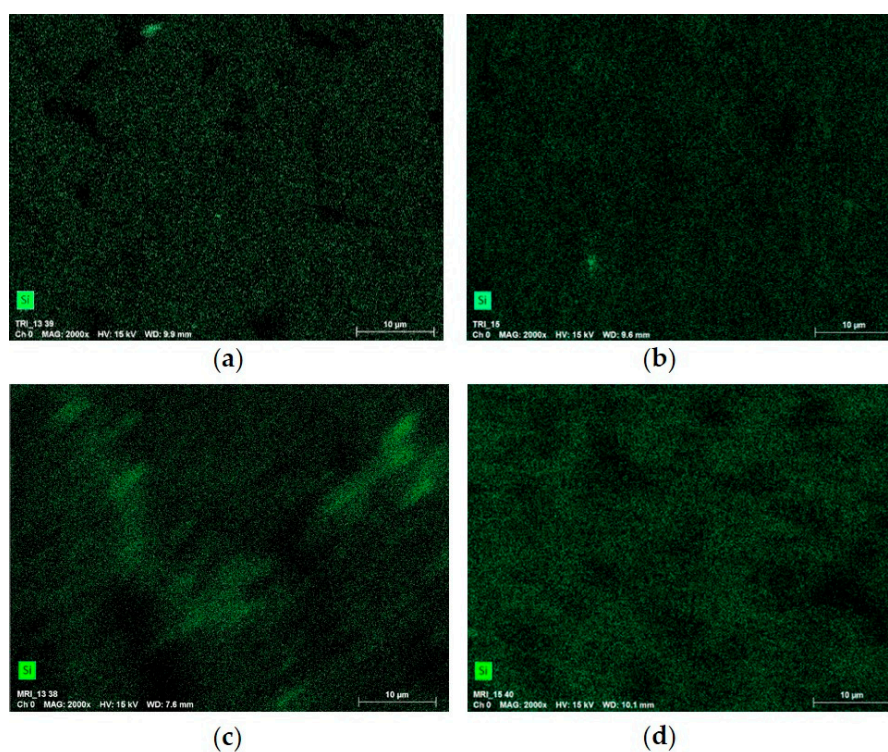

**Figure S3.** Si distribution resulting from EDS-XFR mapping: (a) Si<sub>2</sub>TiO<sub>2</sub>-NC on travertine, (b) Si<sub>2</sub>TiO<sub>2</sub>-MNP on travertine, (c) Si<sub>2</sub>TiO<sub>2</sub>-NC on Carrara marble and (d) Si-TiO<sub>2</sub>-MNP on Carrara marble.



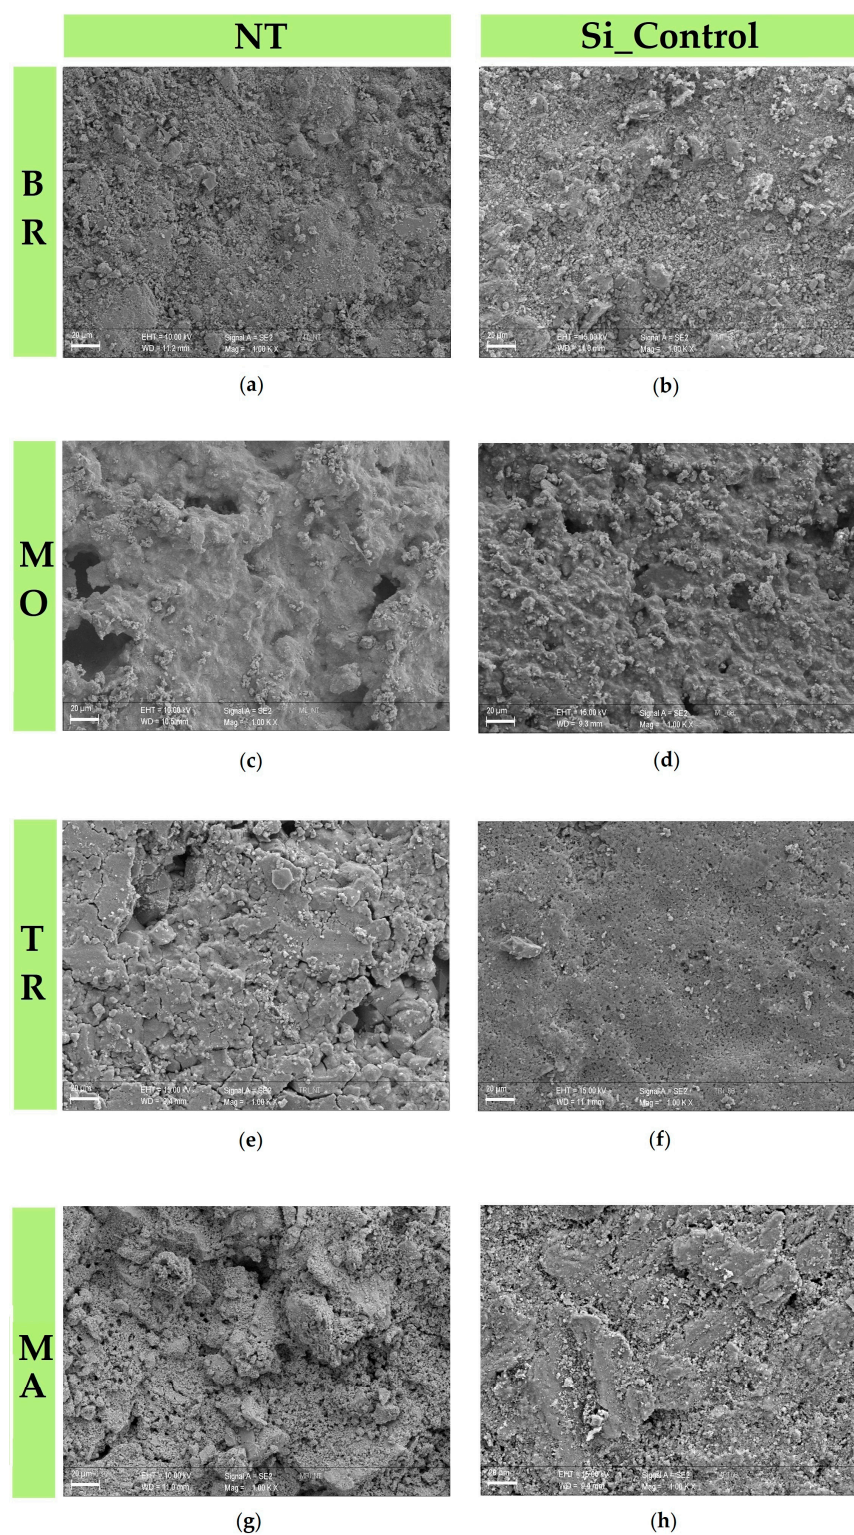

**Figure S4.** SEM micrographs (1000×) of: Brick (BR) (a,b), mortar (MO) (c,d), travertine (TR) (e,f) and Carrara marble (MA) (g,h). NT: untreated; Si\_Control, coating without nanoparticles.

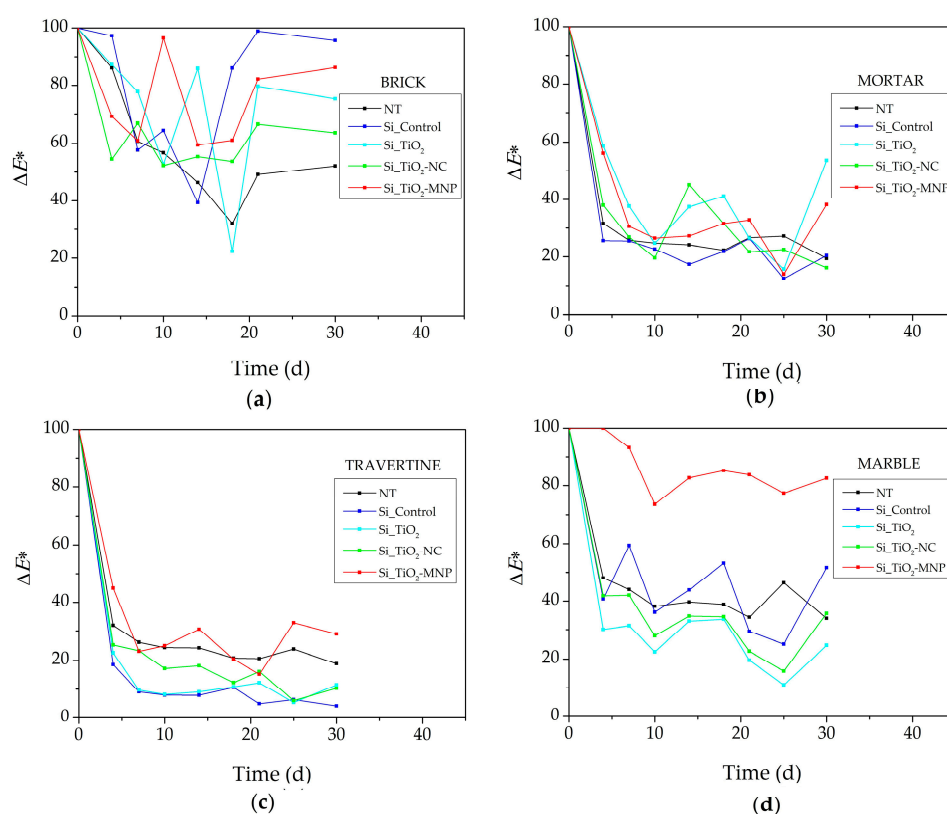

**Figure S5.** Evolution of total colour difference ( $\Delta E^*$ ) for samples irradiated in-situ with natural solar light: (a) brick, (b) mortar, (c) travertine and (d) Carrara marble. NT: untreated; Si\_Control: coating without nanoparticles; Si\_TiO<sub>2</sub>: coating with TiO<sub>2</sub> nanoparticles; Si\_TiO<sub>2</sub>-NC: coating with TiO<sub>2</sub> nanoparticles and loaded silica nanocapsules; Si\_TiO<sub>2</sub>-MNP: coating with TiO<sub>2</sub> nanoparticles and loaded silica mesoporous nanoparticles.

**Table S1.** Amount of applied product calculated by weighting the specimens before and after the application of coatings.

| Sample         | Amount of applied product (kg/m <sup>2</sup> ) |                         |                          |
|----------------|------------------------------------------------|-------------------------|--------------------------|
|                | Si_Control                                     | Si_TiO <sub>2</sub> -NC | Si_TiO <sub>2</sub> -MNP |
| Brick          | 0.62 ± 0.03                                    | 0.56 ± 0.09             | 0.61 ± 0.01              |
| Mortar         | 0.70 ± 0.12                                    | 0.95 ± 0.12             | 1.02 ± 0.14              |
| Travertine     | 0.06 ± 0.02                                    | 0.18 ± 0.03             | 0.13 ± 0.04              |
| Carrara Marble | 0.11 ± 0.03                                    | 0.23 ± 0.02             | 0.23 ± 0.03              |

Si\_Control: coating without nanoparticles; Si\_TiO<sub>2</sub>-NC: coating with TiO<sub>2</sub> nanoparticles and loaded silica nanocapsules; Si\_TiO<sub>2</sub>-MNP: coating with TiO<sub>2</sub> nanoparticles and loaded silica mesoporous nanoparticles.

**Table S2.** Amount of dry matter retained after one week from the application for all samples treated with all coatings.

| Sample         | Quantity of dry matter retained (kg/m <sup>2</sup> ) |                         |                          |
|----------------|------------------------------------------------------|-------------------------|--------------------------|
|                | Si_Control                                           | Si_TiO <sub>2</sub> -NC | Si_TiO <sub>2</sub> -MNP |
| Brick          | 0.017 ± 0.001                                        | 0.033 ± 0.006           | 0.011 ± 0.000            |
| Mortar         | 0.005 ± 0.001                                        | 0.020 ± 0.002           | 0.117 ± 0.005            |
| Travertine     | 0.003 ± 0.002                                        | 0.005 ± 0.001           | 0.002 ± 0.001            |
| Carrara Marble | 0.003 ± 0.001                                        | 0.002 ± 0.001           | 0.001 ± 0.002            |

**Table S3.** Colorimetric Coordinates  $L^*$ ,  $a^*$  and  $b^*$  generated by all coatings on all stone samples.

| Sample | Colour data | Treatment       |                 |                |                         |                |                          |
|--------|-------------|-----------------|-----------------|----------------|-------------------------|----------------|--------------------------|
|        |             | NT              | Si_Control      | NT             | Si_TiO <sub>2</sub> -NC | NT             | Si_TiO <sub>2</sub> -MNP |
| BR     | $L^*$       | $59.8 \pm 2.1$  | $59.7 \pm 1.9$  | $59.3 \pm 0.9$ | $60.1 \pm 1.1$          | $59.6 \pm 1.5$ | $60.2 \pm 1.5$           |
|        | $a^*$       | $14.4 \pm 0.9$  | $14.3 \pm 0.5$  | $14.9 \pm 0.5$ | $14.0 \pm 0.5$          | $14.9 \pm 0.4$ | $14.3 \pm 0.3$           |
|        | $b^*$       | $25.3 \pm 0.8$  | $24.9 \pm 0.7$  | $25.5 \pm 0.6$ | $22.8 \pm 0.6$          | $25.2 \pm 0.6$ | $22.9 \pm 0.6$           |
| MO     | $L^*$       | $74.2 \pm 2.7$  | $73.3 \pm 2.6$  | $73.5 \pm 0.9$ | $73.5 \pm 1.2$          | $73.8 \pm 0.9$ | $73.1 \pm 1.6$           |
|        | $a^*$       | $-0.2 \pm 0.2$  | $-0.7 \pm 0.2$  | $0.1 \pm 0.2$  | $0.2 \pm 0.2$           | $-0.1 \pm 0.1$ | $0.2 \pm 0.1$            |
|        | $b^*$       | $11.1 \pm 0.8$  | $11.4 \pm 0.6$  | $10.2 \pm 0.5$ | $10.5 \pm 0.5$          | $9.9 \pm 0.4$  | $10.3 \pm 0.4$           |
| TR     | $L^*$       | $85.0 \pm 2.8$  | $85.3 \pm 2.4$  | $86.2 \pm 1.8$ | $86.4 \pm 2.0$          | $86.4 \pm 4.0$ | $85.8 \pm 3.6$           |
|        | $a^*$       | $-0.9 \pm 0.2$  | $-0.8 \pm 0.18$ | $-0.3 \pm 0.1$ | $-0.4 \pm 0.2$          | $-0.4 \pm 0.2$ | $-0.4 \pm 0.2$           |
|        | $b^*$       | $2.2 \pm 0.7$   | $1.9 \pm 0.6$   | $1.3 \pm 0.8$  | $1.5 \pm 0.7$           | $1.5 \pm 1.3$  | $1.7 \pm 1.2$            |
| MA     | $L^*$       | $91.8 \pm 0.7$  | $92.3 \pm 0.8$  | $91.6 \pm 1.3$ | $93.9 \pm 1.2$          | $91.4 \pm 0.9$ | $93.7 \pm 0.9$           |
|        | $a^*$       | $-0.8 \pm 0.01$ | $-0.7 \pm 0.01$ | $-0.3 \pm 1.4$ | $-0.3 \pm 0.1$          | $-0.3 \pm 0.1$ | $-0.2 \pm 0.1$           |
|        | $b^*$       | $2.4 \pm 0.4$   | $2.3 \pm 0.4$   | $1.4 \pm 0.5$  | $1.3 \pm 0.6$           | $1.5 \pm 0.3$  | $1.3 \pm 0.2$            |

BR: brick; MO: mortar; TR: travertine; MA: Carrara marble; NT: untreated; Si\_Control: coating without nanoparticles; Si\_TiO<sub>2</sub>-NC: coating with TiO<sub>2</sub> nanoparticles and loaded silica nanocapsules; Si\_TiO<sub>2</sub>-MNP: coating with TiO<sub>2</sub> nanoparticles and loaded silica mesoporous nanoparticles.
